# Supplementary material for: Quantum transport simulation of α-GeTe ferroelectric semiconductor transistors
Source: Royal Society of Chemistry journal article supplement (doi:10.1039/d4tc04706k), 2024-12-09
Supplement: d4tc04706k1.pdf [file d4tc04706k1.pdf]

# Supplementary Materials

## Quantum Transport Simulation of $\alpha$ -GeTe

### Ferroelectric Semiconductor Transistor

Qiang Li,<sup>1</sup> Zongmeng Yang<sup>2</sup>, Xingyue Yang<sup>2</sup>, Wenjing Zhou<sup>3</sup>, Chen Yang,<sup>2</sup> Xiaotian Sun,<sup>4</sup> Shibo Fang,<sup>2\*</sup> and Jing Lu<sup>2,5,6,7,8\*</sup>

<sup>1</sup> Department of Physics, Hubei Minzu University, Enshi, 445000, P. R. China

<sup>2</sup> State Key Laboratory for Mesoscopic Physics and School of Physics, Peking University, Beijing 100871, P. R. China

<sup>3</sup> Department of Statistics, University of Michigan, Ann Arbor 48109, USA

<sup>4</sup> College of Chemistry and Chemical Engineering, and Henan Key Laboratory of Function-Oriented Porous Materials, Luoyang Normal University, Luoyang 471934, P. R. China

<sup>5</sup> Collaborative Innovation Center of Quantum Matter, Beijing 100871, P. R. China

<sup>6</sup> Beijing Key Laboratory for Magnetoelectric Materials and Devices (BKL-MEMD), Peking University, Beijing 100871, P. R. China

<sup>7</sup> Peking University Yangtze Delta Institute of Optoelectronics, Nantong 226010, P. R. China

<sup>8</sup> Key Laboratory for the Physics and Chemistry of Nanodevices, Peking University, Beijing 100871, P. R. China

\*Corresponding Authors: [jinglu@pku.edu.cn](mailto:jinglu@pku.edu.cn), [botk@pku.edu.cn](mailto:botk@pku.edu.cn)

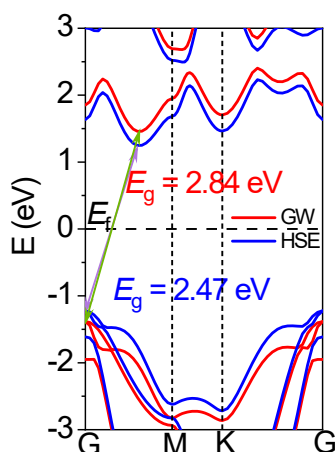

**Fig. S1** Band structure of monolayer (ML)  $\alpha$ -GeTe using hybrid functionals and the GW method.

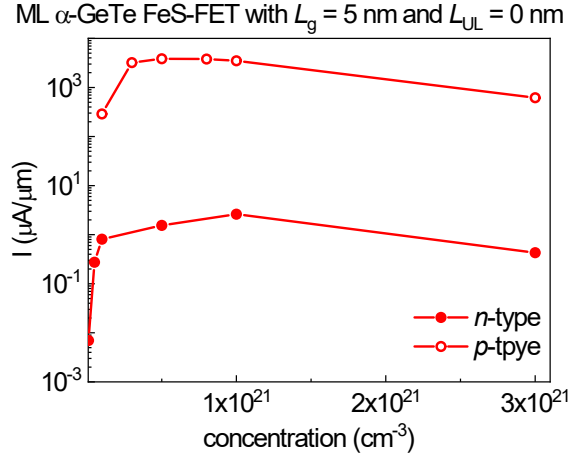

**Fig. S2** Transport current of the ML  $\alpha$ -GeTe FeS-FET (up-state) along the armchair direction with gate length  $L_g = 5$  nm and without underlap length under different  $n$ -type and  $p$ -type doping concentrations.

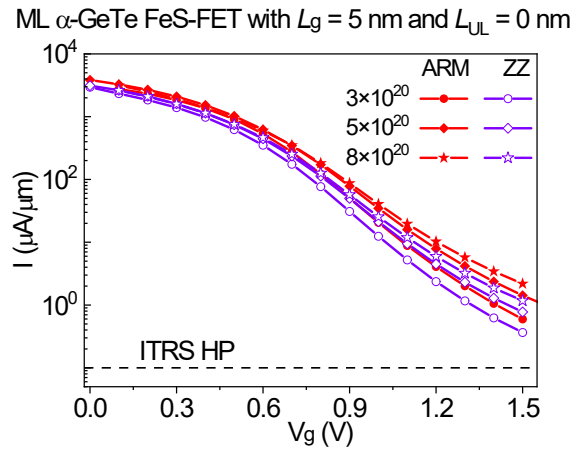

**Fig. S3** Transport current of the ML  $\alpha$ -GeTe FeS-FET (up-state) along the armchair and zigzag direction with gate length  $L_g = 5$  nm and without underlap length under different  $p$ -type doping concentrations.

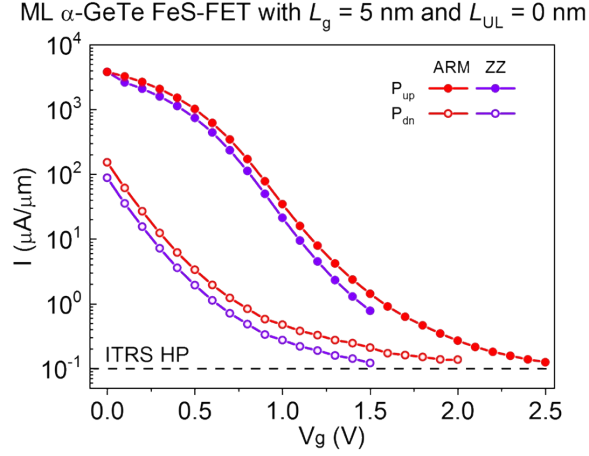

**Fig. S4** Transport current of the ML  $\alpha$ -GeTe FeS-FET (up-state and down-state) along the armchair and zigzag direction with gate length  $L_g = 5$  nm and without underlap length under  $5 \times 10^{20} \text{ cm}^{-3}$  doping concentration.

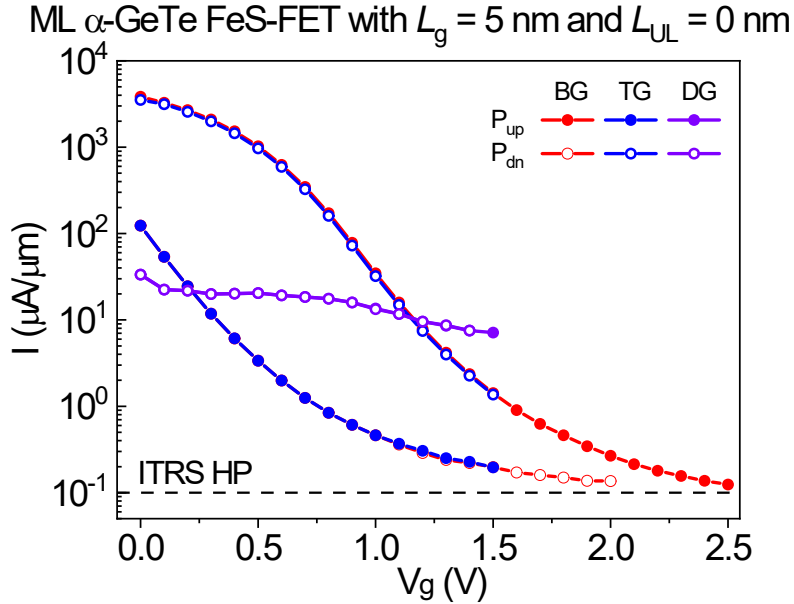

**Fig. S5** Transport current of the bottom gate (BG), top gate (TG), and double (DG) ML  $\alpha$ -GeTe FeS-FET (up-state and down-state) along the armchair direction with gate length  $L_g = 5$  nm and without underlap length  $5 \times 10^{20} \text{ cm}^{-3}$  doping concentration.

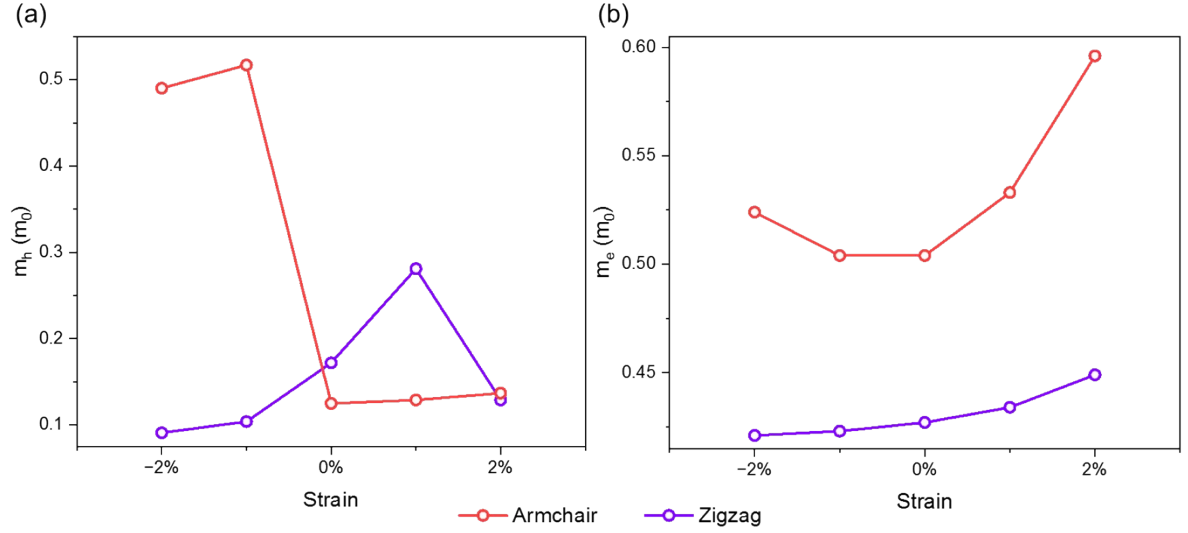

**Fig. S6** The effective mass of (a) holes and (b) electrons for ML  $\alpha$ -GeTe under compressive and tensile stress along armchair and zigzag directions.

**Tab. S1** Benchmark of the ballistic performance of the sub-5 nm  $L_g$  ML  $\alpha$ -GeTe FeS-FET with up-state against the 2028 requirements of the ITRS 2013 for the HP applications.

|                             | $L_g$<br>(nm) | $L_{UL}$<br>(nm) | SS<br>(mV/dec) | $I_{off}$<br>( $\mu A/\mu m$ ) | $I_{on}$<br>( $\mu A/\mu m$ ) | $I_{on}/I_{off}$   | $C_t$<br>(fF/ $\mu m$ ) | $\tau$ (ps) | PDP<br>(fJ/ $\mu m$ ) |
|-----------------------------|---------------|------------------|----------------|--------------------------------|-------------------------------|--------------------|-------------------------|-------------|-----------------------|
| <b>p-type</b>               | 5             | 0                | 312.47         | 0.1                            | 0.34                          | 3.4                | 0.35                    | 655.71      | 0.14                  |
| <b>HP</b>                   |               | 1                | 195.53         | 0.1                            | 243.97                        | $2.44 \times 10^3$ | 0.40                    | 1.05        | 0.16                  |
|                             |               | 2                | 144.52         | 0.1                            | 802.53                        | $8.03 \times 10^3$ | 0.22                    | 0.17        | 0.09                  |
|                             | 3             | 0                |                | 0.1                            | -                             | -                  |                         |             |                       |
|                             |               | 1                |                | 0.1                            | -                             | -                  |                         |             |                       |
|                             |               | 2                | 240.30         | 0.1                            | 13.90                         | $1.39 \times 10^2$ | 0.13                    | 6.13        | 0.05                  |
|                             |               | 3                | 181.17         | 0.1                            | 257.05                        | $2.57 \times 10^3$ | 0.10                    | 0.26        | 0.04                  |
|                             | 1             | 0                |                | 0.1                            | -                             | -                  |                         |             |                       |
|                             |               | 1                |                | 0.1                            | -                             | -                  |                         |             |                       |
|                             |               | 2                |                | 0.1                            | -                             | -                  |                         |             |                       |
|                             |               | 3                |                | 0.1                            | -                             | -                  |                         |             |                       |
|                             |               | 4                | 277.83         | 0.1                            | 20.34                         | $2.03 \times 10^2$ | 0.04                    | 1.29        | 0.02                  |
| <b>ITRS<br/>HP<br/>2028</b> | 5.1           | -                | -              | 0.1                            | 900                           | $9.00 \times 10^3$ | 0.6                     | 0.423       | 0.24                  |

**Tab. S2** Comparison of the  $I_{on}$  and  $SS$  values of the sub-5 nm  $L_g$  ML  $\alpha$ -GeTe FeS-FET with up-state for the HP application between with and without NC dielectric.

|    | $L_g$<br>(nm) | $L_{UL}$<br>(nm) | without NC     |                               | with NC        |                               |                         |             |                       |
|----|---------------|------------------|----------------|-------------------------------|----------------|-------------------------------|-------------------------|-------------|-----------------------|
|    |               |                  | SS<br>(mV/dec) | $I_{on}$<br>( $\mu A/\mu m$ ) | SS<br>(mV/dec) | $I_{on}$<br>( $\mu A/\mu m$ ) | $C_t$<br>(fF/ $\mu m$ ) | $\tau$ (ps) | PDP<br>(fJ/ $\mu m$ ) |
| HP | 5             | 0                | 312.47         | 0.34                          | 224.75         | 0.34                          | 0.60                    | 1137.84     | 0.25                  |
|    |               | 1                | 195.53         | 243.97                        | 154.14         | 564.67                        | 0.29                    | 0.33        | 0.12                  |
|    |               | 2                | 144.52         | 802.53                        | 120.59         | 1933.52                       | 0.17                    | 0.06        | 0.07                  |
|    | 3             | 0                | -              | -                             | -              | -                             | -                       | -           | -                     |
|    |               | 1                | -              | -                             | -              | -                             | -                       | -           | -                     |
|    |               | 2                | 240.30         | 13.90                         | 216.14         | 247.99                        | 0.13                    | 0.34        | 0.05                  |
|    |               | 3                | 181.17         | 257.05                        | 167.95         | 257.05                        | 0.11                    | 0.28        | 0.05                  |
|    | 1             | 0                | -              | -                             | -              | -                             | -                       | -           | -                     |
|    |               | 1                | -              | -                             | -              | -                             | -                       | -           | -                     |
|    |               | 2                | -              | -                             | -              | -                             | -                       | -           | -                     |
|    |               | 3                | -              | -                             | -              | -                             | -                       | -           | -                     |
|    |               | 4                | 277.83         | 20.34                         | 267.38         | 42.22                         | 0.04                    | 0.62        | 0.02                  |
|    | ITRS          | 5.1              |                | 900                           |                | 900                           | 0.60                    | 0.423       | 0.24                  |
